# Supplementary material for: Evidence-Based Application of Acupuncture for Pain Management in Companion Animal Medicine
Source: MDPI journal article supplement (doi:10.3390/vetsci9060252), 2022-05-26
Supplement: s1 [file s1]

**Table S1.** Commonly used Pain points (Data adapted from Ref. [4]).

| <b>Pain State and Location</b> | <b>Common Point Used</b>                                        |
|--------------------------------|-----------------------------------------------------------------|
| <b>General Pain</b>            | LIV-3, GB-34, BL-60, GV-20, SP-6                                |
| <b>Inflammation</b>            | LI-4, GV-14, LI-11                                              |
| <b>Neuropathic Pain</b>        | ST-36, PC-6, TH-5                                               |
| <b>Neck Pain</b>               | Jing Jia Ji, SI-3, BL-23, BL-24, BL-25                          |
| <b>Hip Pain</b>                | GB-29, GB-30, BL-54, BL-60                                      |
| <b>Elbow pain</b>              | SI-8, PC-3, HT-1, LI-11                                         |
| <b>Back Pain</b>               | BL-40, <i>Shen Shu</i> , <i>Bai- Hui</i> , <i>Hua-tuo Ja Ji</i> |
